# Supplementary material for: The genomic basis of cichlid fish adaptation within the deepwater “twilight zone” of Lake Malawi
Source: PubMed Central journal article supplement (PMC6124600; doi:10.1002/evl3.20), 2017-08-29

# Diplotaxodon DAPC ( 11786 SNPs in >80% of individuals) – k = 4

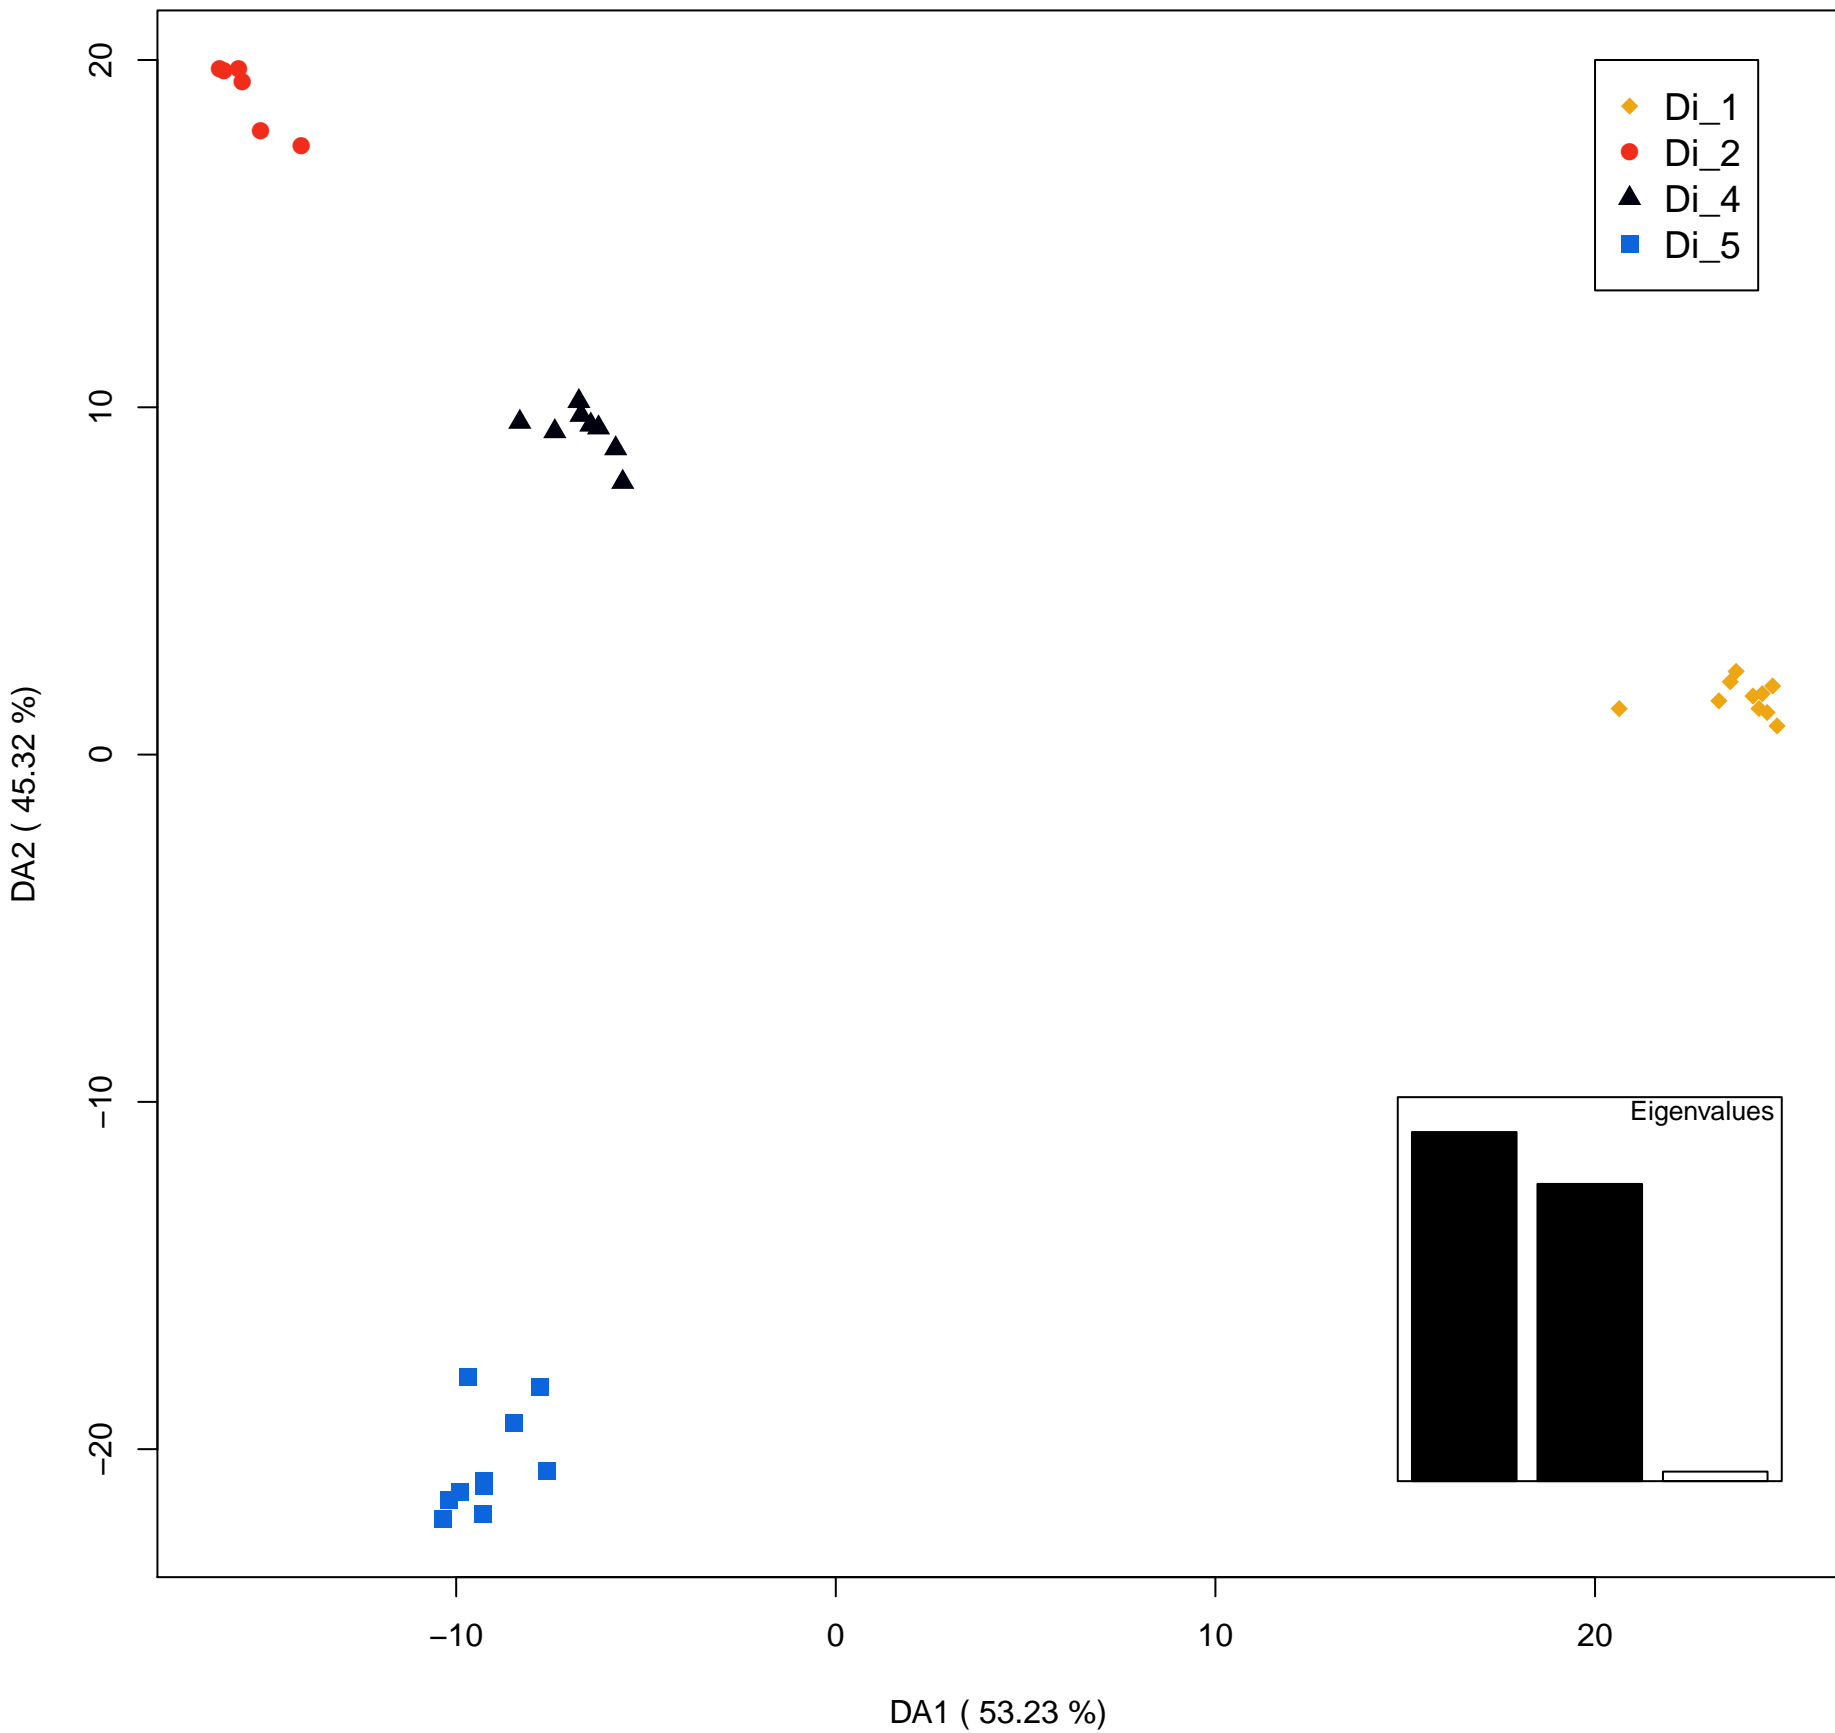

Supplement: EVL3-1-184-s003.pdf [file EVL3-1-184-s003.pdf]
